# Supplementary material
Source: PubMed Central journal article supplement (PMC6269299)
Supplement: 2018_199109-Disclosures_and_Contributions.pdf [file 2018_199109-Disclosures_and_Contributions.pdf]

Haematologica  
HAEMATOL/2018/199109  
Version 3

Recurrent heteroplasmy for the MT-ATP6 p.Ser148Asn (m.8969G>A) mutation in patients with syndromic congenital sideroblastic anemia of variable clinical severity

Simon Berhe, Matthew M Heeney, Dean R Campagna, John F Thompson, Eric J White, Tristen Ross, Roy WA Peake, Jeffery D Hanrahan, Vilmarie Rodriguez, Deborah L Renaud, Mrinal S Patnaik, Eugenia Chang, Sylvia S. Bottomley, and Mark D Fleming

Disclosures: This work was supported by R01 DK087992 to M.D.F. S.B. was supported by the German National Academic Foundation and German Academic Exchange Service. S.S.B. was supported by the US Department of Veterans Affairs and the Oklahoma Center for Advancement of Science and Technology. J.F.T. E.J.W., and T.R. were employees of Claritas Genomics at the time this work was performed.

Contributions: V.R., J.H., and E.C. ascertained patients and together with M.M.P., D.L.R., S.S.B., M.D.F., M.M.H. performed in-depth phenotyping. R.W.A.P. performed urine organic acid assays. D.R.C. performed and analyzed MT-DNA Sanger sequencing. J.F.T., E.J.W., and T.R. performed MT-DNA heteroplasmy analysis. S.B. assembled and analyzed all the data and wrote the first draft of the manuscript. M.D.F. oversaw all the work and completed the manuscript with the review of the other authors.
